# Supplementary material
Source: Research Square preprint supplement (doi:10.21203/rs.3.rs-9022627/v1)
Supplement: Supplementary file 1 [file 1e83c41331615e180eea03ef.docx]

**Comfort with Participating in EOLC – Component Survey Questions**

I feel comfortable identifying and treating symptoms that come at the end of life, such as pain or air hunger/gasping (1-5)

When babies are dying in my unit, I feel able to adequately control their pain/discomfort (1-5)

When caring for an infant who is dying, I feel comfortable speaking to parents about the dying process (1-5)

I feel comfortable guiding a family through withdrawal of life sustaining therapies/compassionate extubation (1-5)

I feel comfortable responding to the emotions and grieving process of parents when their infant is dying (1-5)

It is important to not give parents false hope (1-5)

It is important to respect parental wishes for their child (1-5)

I feel included in goal of care conversations with parents (1-5)

I feel able to express my opinions, values, and beliefs about providing care to dying babies in our unit (1-5)

I feel moral or emotional distress when an infant undergoes withdrawal of life sustaining therapy (1-5 recoded 5-1)

The 1-5 scale is:

1 – Strongly disagree

2 – Somewhat disagree

3 – Unsure

4 – Somewhat agree

5 – Strongly agree

Cronbach’s α = 0.719

**Available Palliative Care Resources and Support – Component Survey Questions**

I have the required resources to provide palliative care in the NICU (1-5)

There is enough assistance from other NICU staff to support babies requiring palliative care and their families (1-5)

The physical environment of my unit is ideal for providing palliative care to dying babies (1-5)

There are policies/guidelines to assist in the delivery of palliative care in my unit (1-5)

Our unit provides adequate bereavement support to families when their child dies (1-5)

Our unit has adequate spiritual support for families of a dying infant (Yes=1 recode 5; No=0 recode 1)

There is enough time to provide for the needs of babies requiring palliative care and their families (1-5)

When a baby dies in my unit, I have sufficient time to spend with the family (1-5)

When providing palliative care for infants in the unit, continuity amongst the NICU team working with a patient and family is important (1-5)

Parents are informed about palliative care options when appropriate (1-5)

The 1-5 scale is:

1 – Strongly disagree

2 – Somewhat disagree

3 – Unsure

4 – Somewhat agree

5 – Strongly agree

Cronbach’s α = 0.825
