# Supplementary material
Source: Research Square preprint supplement (doi:10.21203/rs.3.rs-9022627/v1)
Supplement: Supplementary file 2 [file dfc872766ab4b6fff8a6a6ea.docx]

Independent Variables – Potential Components of Multivariable Regression Models

How long have you worked in the NICU?

1: <1 year

2: 1-5 years

3: 5-10 years

4: >10 years

How long have you worked in the NICU at Mount Sinai?

1: <1 year

2: 1-5 years

3: 5-10 years

4: >10 years

What is your role in the NICU?

Recoded into dummy variables: Dummy variable 1 Dummy variable 2

(Trainee) (Practitioner)

1: Nurse 0 0

2: Attending neonatologist 0 1

3: Attending pediatrician 0 1

4: Neonatal fellow 1 0

5: Resident physician 1 0

6: Advanced practice provider 0 1

7: Other 0 1

Please indicate the hospital in which you primarily work.

Mount Sinai Hospital 1 recode 0

Mount Sinai West 2 recode 1

Have you ever cared for an infant receiving end of life care, such as withdrawal of life sustaining measures like a ventilator, or being made DNR/DNI as they were dying?

1: No, I have never cared for an infant receiving end of life care

2: Yes, once or twice

3: Yes, a few (3-5) times

4: Yes, many (>5) times

Please answer the following statement: I have received specific training on how to care for dying infants

1: Yes

0: No
